# Supplementary material for: Retama raetam Extract for Testicular Health in Type 2 Diabetic Rats: Insight View on the Steroidogenesis, Antioxidants, and Molecular Docking Scores of Bioactive Compounds against Bax
Source: Hindawi journal article supplement (doi:10.1155/2024/7945589), 2024-02-26
Supplement: f1 [file 7945589.f1.pdf]

Table 1S. primer sequences

| Gene Symbol | Forward primer (5'-3' ) | Reverse primer (5'-3' ) | Product size | Accession number | Efficiency % |
|-------------|-------------------------|-------------------------|--------------|------------------|--------------|
| STAR        | F                       | ACCAAACACTCACTTGGCTGCT  | 270 bP       | XM_017350352     | 92.242%      |
|             | R                       | ACACTATTGTCCCCTGCGG     |              |                  |              |
| CYP11A1     | F                       | TACCATTTGGCTGAGGAGAAGG  | 210 bP       | S59219           | 99.955%      |
|             | R                       | GTA CTCTGATAGGCGACCC    |              |                  |              |
| 3B-HSD      | F                       | TGGGACACAGTTCCTGGTCT    | 102 bP       | XM_008248712     | 95.146%      |
|             | R                       | GCCTCATATGGGGTGTCTC     |              |                  |              |
| GAPDH       | F                       | AGACACGATGGTGAAGGTCG    | 164 bP       | L23961           | 96.296%      |
|             | R                       | TGCCGTGGGTGGAATCATA C   |              |                  |              |
| Bax         | F                       | CACGTCTGCGGGGAGTCAC     | 419          | NM_017059.2      | 92.564%      |
|             | R                       | TAGAAAAGGGCAACCACCCG    |              |                  |              |
| Bcl-2       | F                       | TTTCTCTCTTTCCGGCCGTGG   | 208          | NM_016993.1      | 97.513%      |
|             | R                       | GACATCTCCCTGTTGACGCT    |              |                  |              |

STAR: steroidogenic acute regulatory protein. CYP11A1: cytochrome P450 cholesterol side-chain cleavage enzyme. 3B-HSD: hydroxy-delta-5-steroid dehydrogenase, 3 beta- and steroid delta-isomerase 7. GAPDH: glyceraldehyde-3-phosphate dehydrogenase. Bax, Bcl-2-associated X protein. Bcl-2, B-cell lymphoma 2.

Abundance

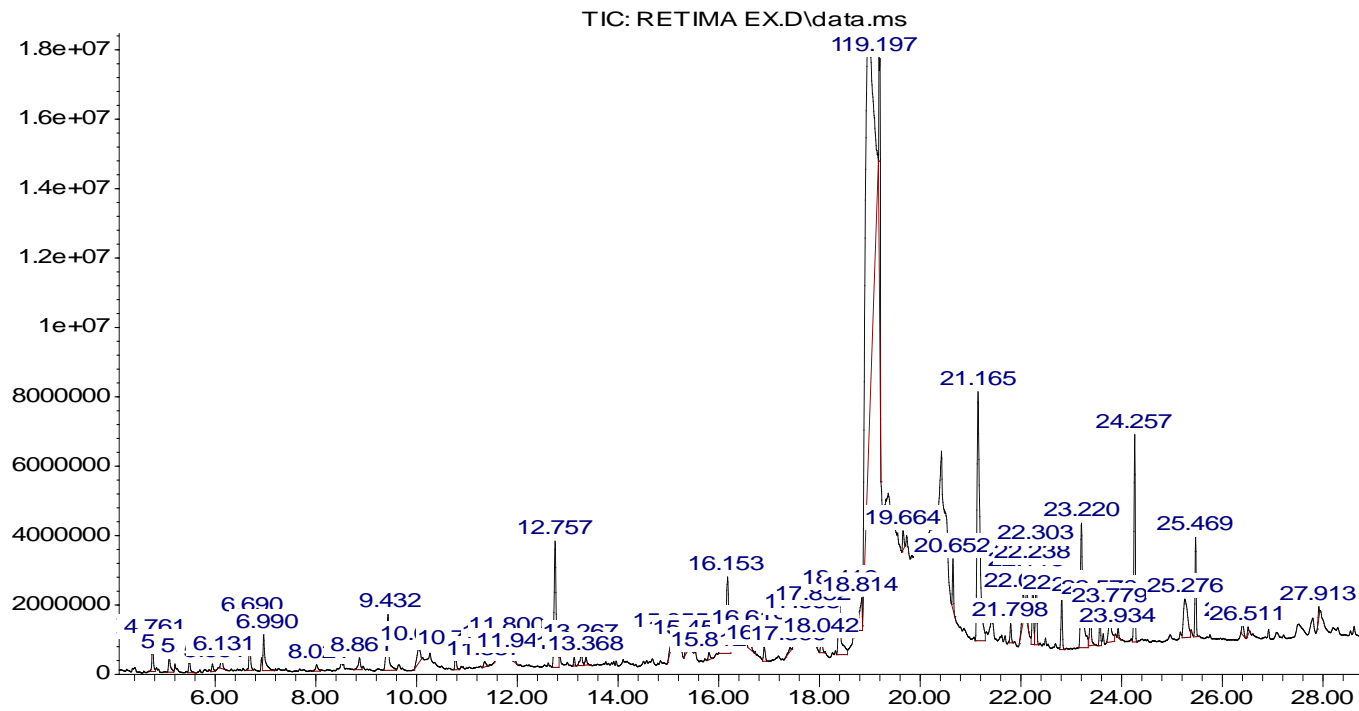

Time-->

Figure 1S. HPLC analysis of the Retama rietam

**Table 2S: GC-MS analysis of Retama**

| Compound number (#) | RT (min) | Area (Ab*s) | Peak Width 50% (min) | Hit Name                                            | Quality | Mol Weight (amu) |
|---------------------|----------|-------------|----------------------|-----------------------------------------------------|---------|------------------|
| 1                   | 4.762    | 1793248     | 0.114                | Furfural                                            | 86      | 96.021           |
| 2                   | 5.1      | 1278283     | 0.143                | 2-Furanmethanol                                     | 90      | 98.037           |
| 3                   | 5.495    | 874792      | 0.16                 | 2-Cyclopentene-1,4-dione                            | 78      | 96.021           |
| 4                   | 5.952    | 520250      | 0.097                | 2(5H)-Furanone                                      | 53      | 84.021           |
| 5                   | 6.13     | 901426      | 0.132                | 1,3-Cyclopentanedione                               | 64      | 98.037           |
| 6                   | 6.69     | 2783083     | 0.137                | 2-Furancarboxaldehyde, 5-methyl-                    | 91      | 110.037          |
| 7                   | 6.988    | 3010076     | 0.24                 | Isomaltol                                           | 74      | 126.032          |
| 8                   | 8.024    | 667212      | 0.154                | Furan, 2-methyl-5-(methylthio)-                     | 35      | 128.03           |
| 9                   | 9.431    | 6058112     | 0.263                | Maltol                                              | 91      | 126.032          |
| 10                  | 10.032   | 2130353     | 0.155                | 4H-Pyran-4-one, 2,3-dihydro-3,5-dihydroxy-6-methyl- | 72      | 144.042          |
| 11                  | 11.663   | 1153346     | 0.212                | 2-Furancarboxaldehyde, 5-(hydroxymethyl)-           | 60      | 126.032          |
| 12                  | 11.8     | 580060      | 0.074                | 2-Furancarboxaldehyde, 5-(hydroxymethyl)-           | 55      | 126.032          |
| 13                  | 12.756   | 11009779    | 0.143                | 2-Methoxy-4-vinylphenol                             | 95      | 150.068          |
| 14                  | 13.133   | 474833      | 0.086                | Naphthalene, 1,2,3,4-tetrahydro-1,1,6-trimethyl-    | 93      | 174.141          |
| 15                  | 13.368   | 562977      | 0.12                 | Phenol, 2-methoxy-3-(2-propenyl)-                   | 98      | 164.084          |
| 16                  | 15.056   | 1182521     | 0.12                 | Phenol, 2-butyl-                                    | 78      | 150.104          |
| 17                  | 15.365   | 1122287     | 0.109                | Phenol, 4-(2-methylpropyl)-                         | 60      | 150.104          |
| 18                  | 15.457   | 511364      | 0.074                | 2-Butanone, 4-(4-hydroxyphenyl)-                    | 53      | 164.084          |
| 19                  | 16.155   | 10144547    | 0.246                | 2,3,5,6-Tetrafluoroanisole                          | 49      | 180.02           |

|    |        |           |       |                                                                                                                                         |    |         |
|----|--------|-----------|-------|-----------------------------------------------------------------------------------------------------------------------------------------|----|---------|
| 20 | 16.618 | 1782409   | 0.143 | Dodecanoic acid                                                                                                                         | 96 | 200.178 |
| 21 | 16.904 | 1007524   | 0.097 | Megastigmatrienone                                                                                                                      | 97 | 190.136 |
| 22 | 17.671 | 869582    | 0.069 | Benzeneacetic acid, 4-hydroxy-, methyl ester                                                                                            | 70 | 166.063 |
| 23 | 17.883 | 2445464   | 0.114 | Benzeneacetic acid, 4-hydroxy-, methyl ester                                                                                            | 81 | 166.063 |
| 24 | 18.043 | 1023822   | 0.092 | 2-Butenimidic acid, 3-methyl-N-phenyl-, methyl ester                                                                                    | 50 | 189.115 |
| 25 | 18.421 | 6631100   | 0.217 | 4-((1E)-3-Hydroxy-1-propenyl)-2-methoxyphenol                                                                                           | 96 | 180.079 |
| 26 | 18.987 | 130938076 | 0.315 | Dodecahydro-7,14-methanodipyrido[1,2-a;1',2'-e][1,5]diazocine                                                                           | 99 | 234.21  |
| 27 | 19.662 | 1105415   | 0.063 | 4,6-Di-O-methyl-.alpha.-d-galactose                                                                                                     | 25 | 208.095 |
| 28 | 20.652 | 2107251   | 0.063 | Hexadecanoic acid, ethyl ester                                                                                                          | 92 | 284.272 |
| 29 | 21.796 | 980507    | 0.074 | Phytol                                                                                                                                  | 83 | 296.308 |
| 30 | 22.037 | 2314137   | 0.109 | 9,12-Octadecadienoic acid (Z,Z)-                                                                                                        | 99 | 280.24  |
| 31 | 22.237 | 4185555   | 0.069 | Linoleic acid ethyl ester                                                                                                               | 99 | 308.272 |
| 32 | 22.306 | 4842950   | 0.08  | Ethyl 9,12,15-octadecatrienoate                                                                                                         | 99 | 306.256 |
| 33 | 22.809 | 2952138   | 0.103 | 7,14-Methano-4H,6H-dipyrido[1,2-a:1',2'-e][1,5]diazocin-4-one, 2,3,7,7a,8,9,10,11,13,14-decahydro-, [7S-(7.alpha.,7a.beta.,14.alpha.)]- | 94 | 246.173 |
| 34 | 23.221 | 12449919  | 0.189 | Lupanine                                                                                                                                | 99 | 248.189 |
| 35 | 23.381 | 2720770   | 0.126 | Methyl ricinoleate                                                                                                                      | 91 | 312.266 |
| 36 | 23.776 | 3554117   | 0.154 | Ricinoleic acid                                                                                                                         | 91 | 298.251 |
| 37 | 24.257 | 10543029  | 0.092 | Hexanedioic acid, bis(2-ethylhexyl) ester                                                                                               | 95 | 370.308 |
| 38 | 25.275 | 6293222   | 0.166 | 7,14-Methano-4H,6H-dipyrido[1,2-a:1',2'-E][1,5]diazocin-4-one, 7,7a,8,9,10,11,13,14-octahydro-, [7R-(7.alpha.,7a.alpha.,14.alpha.)]-    | 98 | 244.158 |
| 39 | 25.47  | 4674379   | 0.097 | 1,2-Benzenedicarboxylic acid, mono(2-ethylhexyl) ester                                                                                  | 91 | 278.152 |

|    |        |        |       |                                                        |    |         |
|----|--------|--------|-------|--------------------------------------------------------|----|---------|
| 40 | 26.408 | 858728 | 0.092 | Linoleic acid ethyl ester                              | 92 | 308.272 |
| 41 | 26.511 | 408025 | 0.057 | Cyclohexane, 1-(1,5-dimethylhexyl)-4-(4-methylpentyl)- | 95 | 280.313 |
| 42 | 27.913 | 594642 | 0.052 | Heptadecane                                            | 97 | 240.282 |
